# Supplementary material
Source: publisher figshare collection journal article supplement (https://acs.figshare.com/ndownloader/files/34801209)
Supplement: Supplementary file 1 [file 34801209]

**Going virtual: Successes and shortcomings of a synchronous STEM outreach event.**

Paige Prizlow1,†, Madelyn Quirk2,†, Kylie J. Schache1,†, Sonia Bhakkad1, Emily C. Laub3, Emily L. Xu1, Sophie Hill4,5,*

1 College of Literature, Science, and the Arts, University of Michigan, Ann Arbor, MI, 48109, USA

2 Department of Psychology, University of Michigan, Ann Arbor, MI, 48109, USA

3 Department of Ecology and Evolutionary Biology, University of Michigan, Ann Arbor, MI, 48109, USA

4Neuroscience Graduate Program, University of Michigan, Ann Arbor, MI, 48109, USA

5 Department of Human Genetics, University of Michigan, Ann Arbor, MI, 48109, USA

*E-mail: sfhill@umich.edu

| **Table S1. Materials required for hands-on activities** | |
| --- | --- |
| Activity | Materials |
| Play-doh molecules | Small tub of Play-doh (Pawtucket, RI), 20 toothpicks |
|  |  |
| Ink chromatography | Three black pens of different brands, three chromatography strips, water, a plastic cup |
|  |  |
| Car programming | None (virtual activity) |
|  |  |
| Making an electromagnet | D battery, small length of copper wire, nail, insulating dough |
|  |  |
| Girls Who Code | None (virtual activity) |
|  |  |
| Comparing solubility | Salt, sugar, flour, chalk powder, four clear plastic cups, water |
|  |  |
| Shooting for the stars | Receipt paper, one pen, colored pencils, one small cardboard tube, black construction paper, scissors, toothpicks, rubber bands, several printed sheets (available on our website at <https://www.femmes.studentorgs.umich.edu/capstone-activities> or on demand) |
|  |  |
| Tic-tac-toe computer science | Paper, pencils, several printed sheets (available on our website at <https://www.femmes.studentorgs.umich.edu/capstone-activities> or on demand) |
|  |  |
| Chemistry of lava lamps | Mineral oil, water, food coloring, a clear plastic cup, one Alka-seltzer tablet (Elkhart, IN) |
|  |  |
| Let’s face it | Several printed sheets (available on our website at <https://www.femmes.studentorgs.umich.edu/capstone-activities> or on demand) |
|  |  |
| Phase changes | Baking soda, vinegar, one nitrile finger cot, a plastic bottle |
|  |  |
| Bouncy balls | Borax, water, Elmer’s liquid glue, two small cups, a stirring stick, colored food dye |
|  |  |
| Penny boats | Water, one small plastic tub, sheets of aluminum foil, pennies |

| **Table S2. Event attendance and survey completion** | | | |  |
| --- | --- | --- | --- | --- |
| Group | Week | Attended Event | Completed survey | Response Rate (%) |
| Fall 2020 Participants | Pre-survey | - | 79 | - |
| 1 | 71 | 70 | (99) |
|  | 2 | 77 | 76 | (99) |
|  | 3 | 79 | 73 | (92) |
|  | 4 | 66 | 66 | (100) |
|  | 5 | 70 | 39 | (56) |
|  | 6 | 66 | 57 | (86) |
|  |  |  |  |  |
| Spring 2021 Participants | Pre-survey | - | 125 | - |
| 1 | 112 | 85 | (76) |
| 2 | 97 | 85 | (88) |
|  | 3 | 79 | 62 | (78) |
|  | 4 | 92 | 72 | (78) |
|  |  |  |  |  |
| Spring 2021 Group Leaders | 1 | 19 | 15 | (79) |
| 2 | 20 | 14 | (70) |
| 3 | 20 | 20 | (100) |
|  | 4 | 16 | 1 | (6) |
|  |  |  |  |  |
| Fall 2021 Participants | Pre-survey | - | 49 | - |
|  | 1 | 48 | 28 | (58) |
|  | 2 | 47 | 33 | (70) |
|  | 3 | 38 | 24 | (63) |
|  | 4 | 32 | 21 | (66) |
|  | 5 | 20 | 18 | (90) |
|  |  |  |  |  |
| Fall 2021 Group Leaders | 1 | 15 | 11 | (73) |
|  | 2 | 14 | 12 | (71) |
|  | 3 | 12 | 10 | (100) |
|  | 4 | 17 | 15 | (88) |
